# Supplementary material for: Insights into the Potential Role of Gordonia alkanivorans Strains in Biotechnologies
Source: MDPI journal article supplement (doi:10.3390/pr11113184), 2023-11-08
Supplement: s1 [file s1]

**Table S1.** Assembly metrics of the strains.

| Strain | Genome length, Mb | Number of contigs | N50, bp |
|--------|-------------------|-------------------|---------|
| 96     | 4,9               | 80                | 167,760 |
| 129    | 4,9               | 86                | 265,593 |
| 132    | 5,0               | 85                | 256,904 |
| 133    | 5,0               | 87                | 225,227 |
| 134    | 5,1               | 75                | 182,877 |
| 142    | 5,0               | 96                | 142,845 |
| 144    | 4,2               | 303               | 27,240  |
| 12     | 4,9               | 82                | 285,499 |
| 152    | 5,0               | 91                | 169,160 |

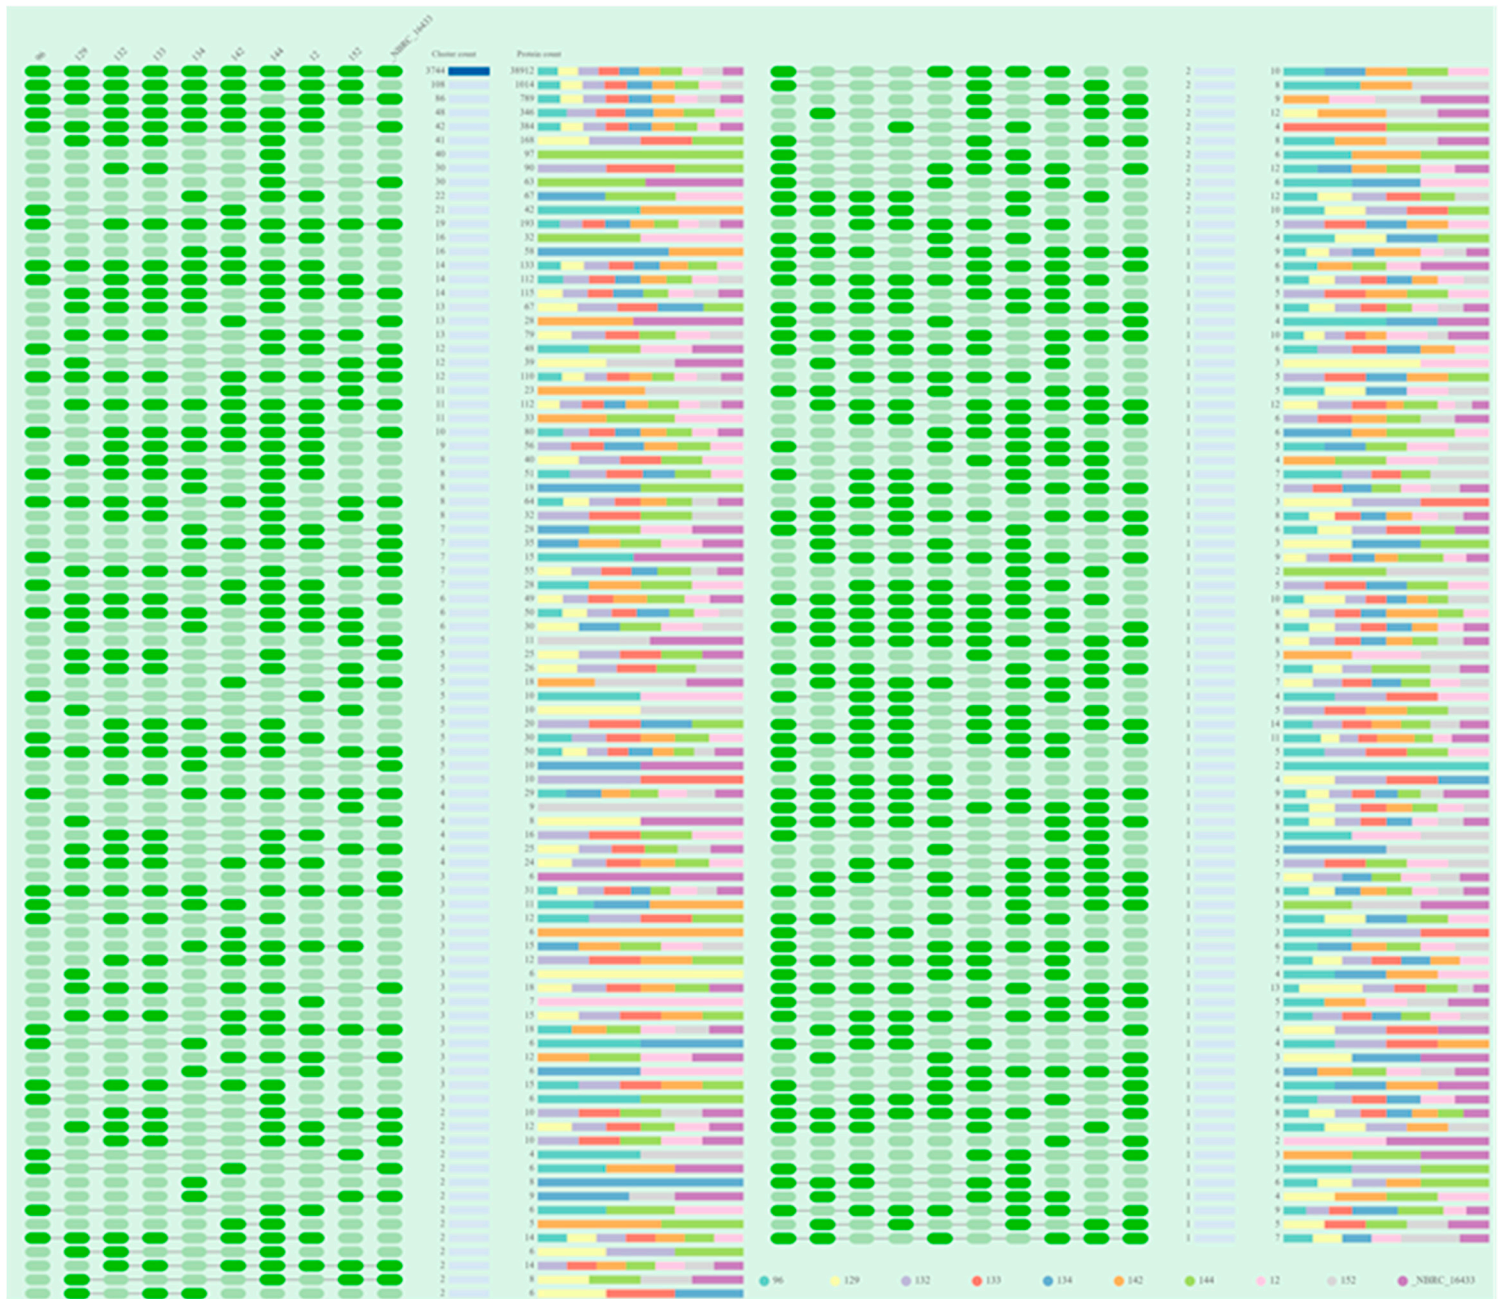

**Figure S1.** A diagram showing the results of overlapping clusters of orthologous genes in strains (overlapping clusters containing proteins from different strains, sorted in descending order).

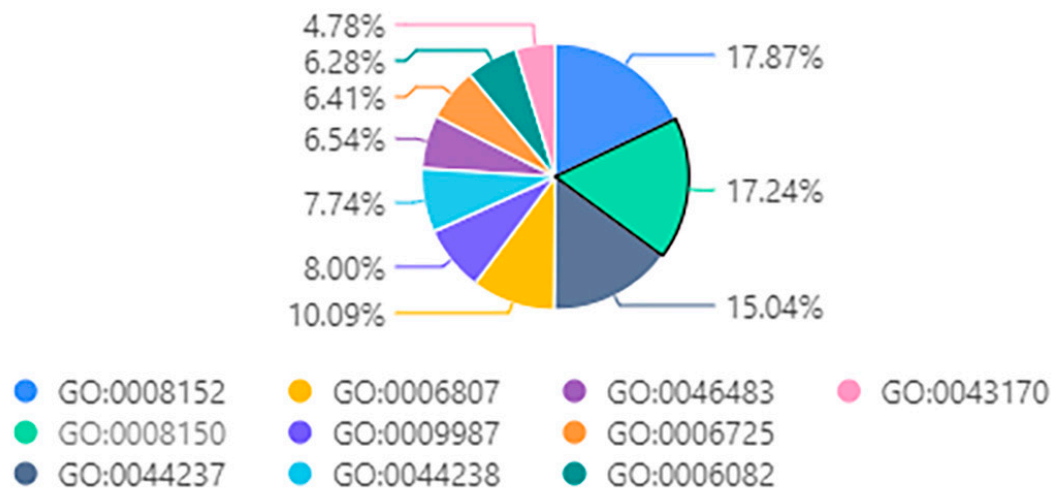

#### Biological process list

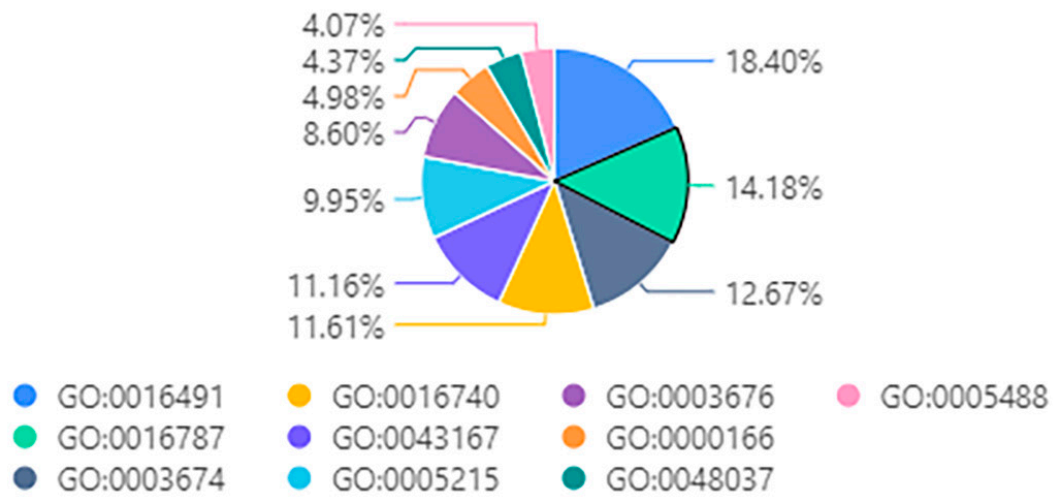

#### Molecular function list

**Figure S2.** GO annotation core clusters for the representatives of the first group (strains 129, 144, 132, 133).

**Table S2.** Biological process list for the representatives of the first group.

| GO                         | Count of unique input accessions | Name                                             |
|----------------------------|----------------------------------|--------------------------------------------------|
| <a href="#">GO:0008152</a> | 942                              | metabolic process                                |
| <a href="#">GO:0008150</a> | 909                              | biological_process                               |
| <a href="#">GO:0044237</a> | 793                              | cellular metabolic process                       |
| <a href="#">GO:0006807</a> | 532                              | nitrogen compound metabolic process              |
| <a href="#">GO:0009987</a> | 422                              | cellular process                                 |
| <a href="#">GO:0044238</a> | 408                              | primary metabolic process                        |
| <a href="#">GO:0046483</a> | 345                              | heterocycle metabolic process                    |
| <a href="#">GO:0006725</a> | 338                              | cellular aromatic compound metabolic process     |
| <a href="#">GO:0006082</a> | 331                              | organic acid metabolic process                   |
| <a href="#">GO:0043170</a> | 252                              | macromolecule metabolic process                  |
| <a href="#">GO:0006139</a> | 235                              | nucleobase-containing compound metabolic process |
| <a href="#">GO:0016070</a> | 170                              | RNA metabolic process                            |
| <a href="#">GO:0065007</a> | 163                              | biological regulation                            |
| <a href="#">GO:0051186</a> | 156                              | cofactor metabolic process                       |
| <a href="#">GO:0006793</a> | 148                              | phosphorus metabolic process                     |
| <a href="#">GO:0006629</a> | 145                              | lipid metabolic process                          |
| <a href="#">GO:0044255</a> | 131                              | cellular lipid metabolic process                 |
| <a href="#">GO:0050896</a> | 114                              | response to stimulus                             |
| <a href="#">GO:0006810</a> | 109                              | transport                                        |
| <a href="#">GO:0051234</a> | 109                              | establishment of localization                    |
| <a href="#">GO:0006412</a> | 96                               | translation                                      |
| <a href="#">GO:0009117</a> | 83                               | nucleotide metabolic process                     |
| <a href="#">GO:0005975</a> | 65                               | carbohydrate metabolic process                   |
| <a href="#">GO:0016043</a> | 61                               | cellular component organization                  |
| <a href="#">GO:0006811</a> | 52                               | ion transport                                    |
| <a href="#">GO:0009116</a> | 48                               | nucleoside metabolic process                     |
| <a href="#">GO:0043603</a> | 47                               | cellular amide metabolic process                 |
| <a href="#">GO:0019538</a> | 44                               | protein metabolic process                        |
| <a href="#">GO:0006396</a> | 40                               | RNA processing                                   |

|                            |    |                                                |
|----------------------------|----|------------------------------------------------|
| <a href="#">GO:0006518</a> | 40 | peptide metabolic process                      |
| <a href="#">GO:0032502</a> | 39 | developmental process                          |
| <a href="#">GO:0006259</a> | 35 | DNA metabolic process                          |
| <a href="#">GO:0006260</a> | 35 | DNA replication                                |
| <a href="#">GO:0006281</a> | 35 | DNA repair                                     |
| <a href="#">GO:0006766</a> | 35 | vitamin metabolic process                      |
| <a href="#">GO:0051179</a> | 32 | localization                                   |
| <a href="#">GO:0051704</a> | 32 | multi-organism process                         |
| <a href="#">GO:0005976</a> | 29 | polysaccharide metabolic process               |
| <a href="#">GO:0007154</a> | 29 | cell communication                             |
| <a href="#">GO:0043412</a> | 29 | macromolecule modification                     |
| <a href="#">GO:0045333</a> | 29 | cellular respiration                           |
| <a href="#">GO:0042180</a> | 27 | cellular ketone metabolic process              |
| <a href="#">GO:0006865</a> | 26 | amino acid transport                           |
| <a href="#">GO:0006805</a> | 25 | xenobiotic metabolic process                   |
| <a href="#">GO:0032989</a> | 25 | cellular component morphogenesis               |
| <a href="#">GO:0006464</a> | 24 | cellular protein modification process          |
| <a href="#">GO:0006091</a> | 22 | generation of precursor metabolites and energy |
| <a href="#">GO:0042254</a> | 22 | ribosome biogenesis                            |
| <a href="#">GO:0042440</a> | 20 | pigment metabolic process                      |
| <a href="#">GO:0071555</a> | 20 | cell wall organization                         |
| <a href="#">GO:0015031</a> | 18 | protein transport                              |
| <a href="#">GO:0006066</a> | 17 | alcohol metabolic process                      |
| <a href="#">GO:0065003</a> | 17 | macromolecular complex assembly                |
| <a href="#">GO:0009308</a> | 16 | amine metabolic process                        |
| <a href="#">GO:0017144</a> | 15 | drug metabolic process                         |
| <a href="#">GO:0019748</a> | 15 | secondary metabolic process                    |
| <a href="#">GO:0032196</a> | 12 | transposition                                  |
| <a href="#">GO:0006508</a> | 11 | proteolysis                                    |
| <a href="#">GO:0006457</a> | 10 | protein folding                                |
| <a href="#">GO:0006730</a> | 9  | one-carbon metabolic process                   |

|                            |   |                                               |
|----------------------------|---|-----------------------------------------------|
| <a href="#">GO:0006081</a> | 8 | cellular aldehyde metabolic process           |
| <a href="#">GO:0006112</a> | 8 | energy reserve metabolic process              |
| <a href="#">GO:0006818</a> | 8 | hydrogen transport                            |
| <a href="#">GO:0009225</a> | 8 | nucleotide-sugar metabolic process            |
| <a href="#">GO:0015849</a> | 8 | organic acid transport                        |
| <a href="#">GO:0008643</a> | 7 | carbohydrate transport                        |
| <a href="#">GO:0022411</a> | 7 | cellular component disassembly                |
| <a href="#">GO:0022607</a> | 7 | cellular component assembly                   |
| <a href="#">GO:0051189</a> | 7 | prosthetic group metabolic process            |
| <a href="#">GO:0051301</a> | 7 | cell division                                 |
| <a href="#">GO:0043101</a> | 6 | purine-containing compound salvage            |
| <a href="#">GO:0051641</a> | 6 | cellular localization                         |
| <a href="#">GO:0006119</a> | 5 | oxidative phosphorylation                     |
| <a href="#">GO:0006304</a> | 5 | DNA modification                              |
| <a href="#">GO:0006662</a> | 5 | glycerol ether metabolic process              |
| <a href="#">GO:0032501</a> | 5 | multicellular organismal process              |
| <a href="#">GO:0040007</a> | 5 | growth                                        |
| <a href="#">GO:0006996</a> | 4 | organelle organization                        |
| <a href="#">GO:0007049</a> | 4 | cell cycle                                    |
| <a href="#">GO:0008655</a> | 4 | pyrimidine-containing compound salvage        |
| <a href="#">GO:0015979</a> | 4 | photosynthesis                                |
| <a href="#">GO:0016032</a> | 4 | viral process                                 |
| <a href="#">GO:0034622</a> | 4 | cellular macromolecular complex assembly      |
| <a href="#">GO:0042445</a> | 4 | hormone metabolic process                     |
| <a href="#">GO:0044419</a> | 4 | interspecies interaction between organisms    |
| <a href="#">GO:0045229</a> | 4 | external encapsulating structure organization |
| <a href="#">GO:0000003</a> | 3 | reproduction                                  |
| <a href="#">GO:0006869</a> | 3 | lipid transport                               |
| <a href="#">GO:0007059</a> | 3 | chromosome segregation                        |
| <a href="#">GO:0009404</a> | 3 | toxin metabolic process                       |
| <a href="#">GO:0015074</a> | 3 | DNA integration                               |

|                            |   |                                           |
|----------------------------|---|-------------------------------------------|
| <a href="#">GO:0015833</a> | 3 | peptide transport                         |
| <a href="#">GO:0032392</a> | 3 | DNA geometric change                      |
| <a href="#">GO:0043094</a> | 3 | cellular metabolic compound salvage       |
| <a href="#">GO:0051276</a> | 3 | chromosome organization                   |
| <a href="#">GO:0006928</a> | 2 | movement of cell or subcellular component |
| <a href="#">GO:0007005</a> | 2 | mitochondrion organization                |
| <a href="#">GO:0015976</a> | 2 | carbon utilization                        |
| <a href="#">GO:0016049</a> | 2 | cell growth                               |
| <a href="#">GO:0046903</a> | 2 | secretion                                 |
| <a href="#">GO:0048469</a> | 2 | cell maturation                           |
| <a href="#">GO:0051604</a> | 2 | protein maturation                        |
| <a href="#">GO:0000746</a> | 1 | conjugation                               |
| <a href="#">GO:0002376</a> | 1 | immune system process                     |
| <a href="#">GO:0006113</a> | 1 | fermentation                              |
| <a href="#">GO:0006323</a> | 1 | DNA packaging                             |
| <a href="#">GO:0006354</a> | 1 | DNA-templated transcription, elongation   |
| <a href="#">GO:0007031</a> | 1 | peroxisome organization                   |
| <a href="#">GO:0009292</a> | 1 | genetic transfer                          |
| <a href="#">GO:0015835</a> | 1 | peptidoglycan transport                   |
| <a href="#">GO:0015893</a> | 1 | drug transport                            |
| <a href="#">GO:0015920</a> | 1 | lipopolysaccharide transport              |
| <a href="#">GO:0015931</a> | 1 | nucleobase-containing compound transport  |
| <a href="#">GO:0016458</a> | 1 | gene silencing                            |
| <a href="#">GO:0040011</a> | 1 | locomotion                                |
| <a href="#">GO:0043449</a> | 1 | cellular alkene metabolic process         |
| <a href="#">GO:0045230</a> | 1 | capsule organization                      |
| <a href="#">GO:0048285</a> | 1 | organelle fission                         |
| <a href="#">GO:0050877</a> | 1 | neurological system process               |
| <a href="#">GO:0051180</a> | 1 | vitamin transport                         |
| <a href="#">GO:0051181</a> | 1 | cofactor transport                        |
| <a href="#">GO:0051258</a> | 1 | protein polymerization                    |



**Table S3.** Molecular function list for the representatives of the first group.

| GO                         | Count of unique<br>input accessions | Name                                     |
|----------------------------|-------------------------------------|------------------------------------------|
| <a href="#">GO:0016491</a> | 122                                 | oxidoreductase activity                  |
| <a href="#">GO:0016787</a> | 94                                  | hydrolase activity                       |
| <a href="#">GO:0003674</a> | 84                                  | molecular_function                       |
| <a href="#">GO:0016740</a> | 77                                  | transferase activity                     |
| <a href="#">GO:0043167</a> | 74                                  | ion binding                              |
| <a href="#">GO:0005215</a> | 66                                  | transporter activity                     |
| <a href="#">GO:0003676</a> | 57                                  | nucleic acid binding                     |
| <a href="#">GO:0000166</a> | 33                                  | nucleotide binding                       |
| <a href="#">GO:0048037</a> | 29                                  | cofactor binding                         |
| <a href="#">GO:0005488</a> | 27                                  | binding                                  |
| <a href="#">GO:0008233</a> | 21                                  | peptidase activity                       |
| <a href="#">GO:0001882</a> | 18                                  | nucleoside binding                       |
| <a href="#">GO:0004497</a> | 10                                  | monooxygenase activity                   |
| <a href="#">GO:0003824</a> | 7                                   | catalytic activity                       |
| <a href="#">GO:0004871</a> | 7                                   | signal transducer activity               |
| <a href="#">GO:0016829</a> | 6                                   | lyase activity                           |
| <a href="#">GO:0016209</a> | 5                                   | antioxidant activity                     |
| <a href="#">GO:0016874</a> | 5                                   | ligase activity                          |
| <a href="#">GO:0004386</a> | 4                                   | helicase activity                        |
| <a href="#">GO:0016853</a> | 4                                   | isomerase activity                       |
| <a href="#">GO:0051213</a> | 4                                   | dioxygenase activity                     |
| <a href="#">GO:0005515</a> | 3                                   | protein binding                          |
| <a href="#">GO:0009055</a> | 2                                   | electron carrier activity                |
| <a href="#">GO:0031409</a> | 2                                   | pigment binding                          |
| <a href="#">GO:0001871</a> | 1                                   | pattern binding                          |
| <a href="#">GO:0008144</a> | 1                                   | drug binding                             |
| <a href="#">GO:0008289</a> | 1                                   | lipid binding                            |
| <a href="#">GO:0008641</a> | 1                                   | small protein activating enzyme activity |
| <a href="#">GO:0019239</a> | 1                                   | deaminase activity                       |
| <a href="#">GO:0030246</a> | 1                                   | carbohydrate binding                     |
| <a href="#">GO:0033218</a> | 1                                   | amide binding                            |
| <a href="#">GO:0043021</a> | 1                                   | ribonucleoprotein complex binding        |



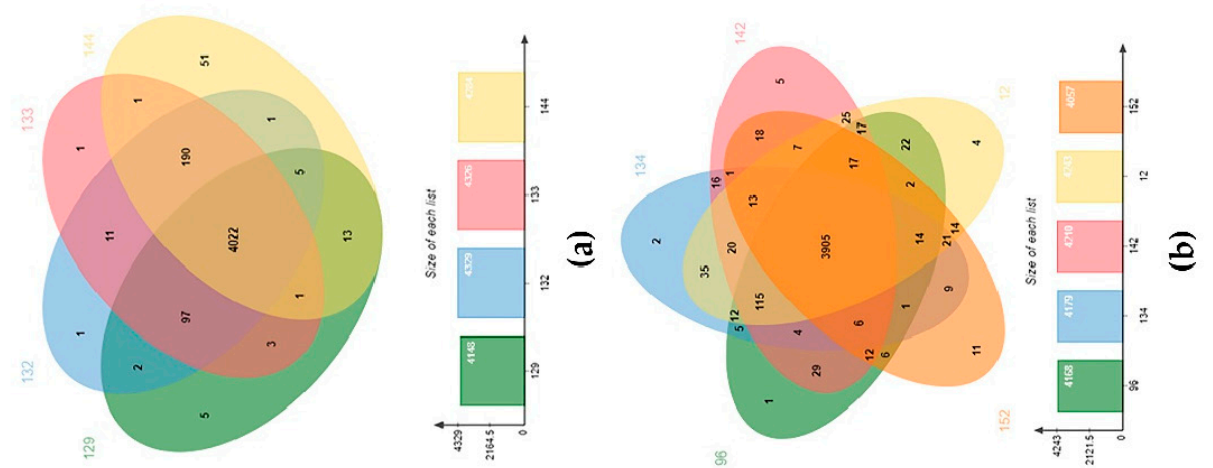

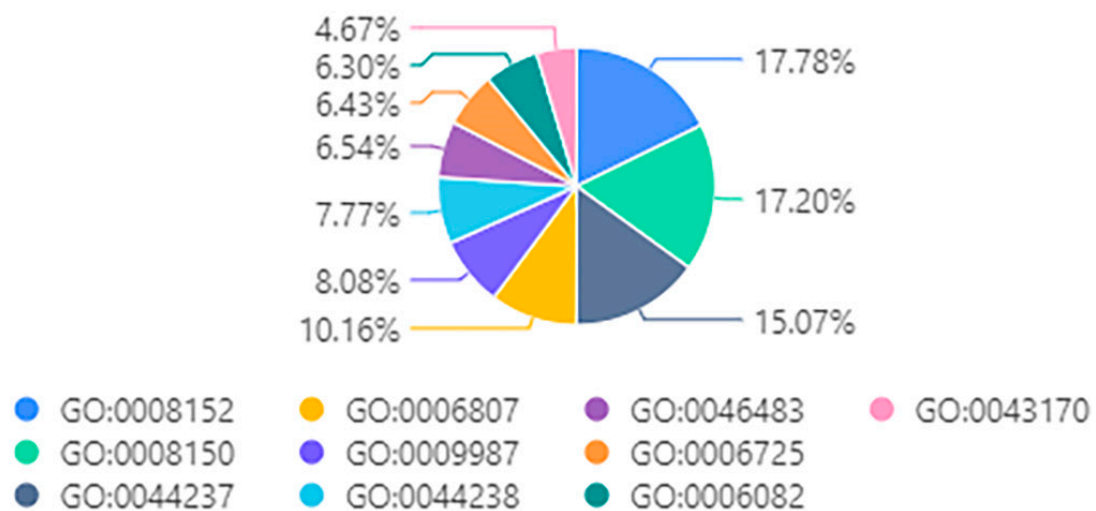

### Biological process list

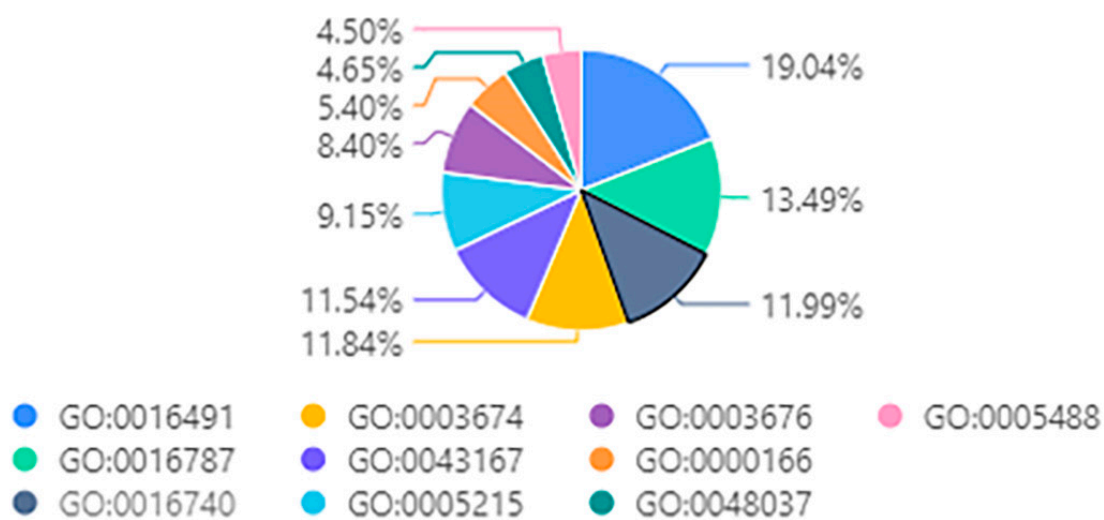

### Molecular function list

**Figure S4.** GO annotation core clusters for the representatives of the second group (96, 134, 142, 12, 152).

**Table S4.** Biological process list for the representatives of the second group.

| GO                         | Count of unique input<br>accessions | Name                                             |
|----------------------------|-------------------------------------|--------------------------------------------------|
| <a href="#">GO:0008152</a> | 959                                 | metabolic process                                |
| <a href="#">GO:0008150</a> | 928                                 | biological_process                               |
| <a href="#">GO:0044237</a> | 813                                 | cellular metabolic process                       |
| <a href="#">GO:0006807</a> | 548                                 | nitrogen compound metabolic process              |
| <a href="#">GO:0009987</a> | 436                                 | cellular process                                 |
| <a href="#">GO:0044238</a> | 419                                 | primary metabolic process                        |
| <a href="#">GO:0046483</a> | 353                                 | heterocycle metabolic process                    |
| <a href="#">GO:0006725</a> | 347                                 | cellular aromatic compound metabolic process     |
| <a href="#">GO:0006082</a> | 340                                 | organic acid metabolic process                   |
| <a href="#">GO:0043170</a> | 252                                 | macromolecule metabolic process                  |
| <a href="#">GO:0006139</a> | 241                                 | nucleobase-containing compound metabolic process |
| <a href="#">GO:0065007</a> | 168                                 | biological regulation                            |
| <a href="#">GO:0016070</a> | 166                                 | RNA metabolic process                            |
| <a href="#">GO:0051186</a> | 160                                 | cofactor metabolic process                       |
| <a href="#">GO:0006629</a> | 154                                 | lipid metabolic process                          |
| <a href="#">GO:0006793</a> | 147                                 | phosphorus metabolic process                     |
| <a href="#">GO:0044255</a> | 138                                 | cellular lipid metabolic process                 |
| <a href="#">GO:0050896</a> | 115                                 | response to stimulus                             |
| <a href="#">GO:0006810</a> | 108                                 | transport                                        |
| <a href="#">GO:0051234</a> | 108                                 | establishment of localization                    |
| <a href="#">GO:0006412</a> | 97                                  | translation                                      |
| <a href="#">GO:0009117</a> | 85                                  | nucleotide metabolic process                     |
| <a href="#">GO:0005975</a> | 71                                  | carbohydrate metabolic process                   |
| <a href="#">GO:0016043</a> | 66                                  | cellular component organization                  |
| <a href="#">GO:0006811</a> | 57                                  | ion transport                                    |
| <a href="#">GO:0009116</a> | 51                                  | nucleoside metabolic process                     |
| <a href="#">GO:0032502</a> | 48                                  | developmental process                            |
| <a href="#">GO:0019538</a> | 44                                  | protein metabolic process                        |
| <a href="#">GO:0043603</a> | 43                                  | cellular amide metabolic process                 |
| <a href="#">GO:0006396</a> | 37                                  | RNA processing                                   |
| <a href="#">GO:0006518</a> | 37                                  | peptide metabolic process                        |
| <a href="#">GO:0006766</a> | 36                                  | vitamin metabolic process                        |
| <a href="#">GO:0006259</a> | 35                                  | DNA metabolic process                            |
| <a href="#">GO:0006260</a> | 34                                  | DNA replication                                  |
| <a href="#">GO:0006281</a> | 33                                  | DNA repair                                       |
| <a href="#">GO:0042180</a> | 30                                  | cellular ketone metabolic process                |

|                            |    |                                                |
|----------------------------|----|------------------------------------------------|
| <a href="#">GO:0051704</a> | 30 | multi-organism process                         |
| <a href="#">GO:0005976</a> | 29 | polysaccharide metabolic process               |
| <a href="#">GO:0045333</a> | 29 | cellular respiration                           |
| <a href="#">GO:0051179</a> | 29 | localization                                   |
| <a href="#">GO:0007154</a> | 27 | cell communication                             |
| <a href="#">GO:0032989</a> | 27 | cellular component morphogenesis               |
| <a href="#">GO:0043412</a> | 27 | macromolecule modification                     |
| <a href="#">GO:0006865</a> | 25 | amino acid transport                           |
| <a href="#">GO:0042254</a> | 24 | ribosome biogenesis                            |
| <a href="#">GO:0006091</a> | 23 | generation of precursor metabolites and energy |
| <a href="#">GO:0006464</a> | 23 | cellular protein modification process          |
| <a href="#">GO:0042440</a> | 20 | pigment metabolic process                      |
| <a href="#">GO:0006805</a> | 19 | xenobiotic metabolic process                   |
| <a href="#">GO:0065003</a> | 18 | macromolecular complex assembly                |
| <a href="#">GO:0071555</a> | 18 | cell wall organization                         |
| <a href="#">GO:0006066</a> | 17 | alcohol metabolic process                      |
| <a href="#">GO:0015031</a> | 17 | protein transport                              |
| <a href="#">GO:0009308</a> | 16 | amine metabolic process                        |
| <a href="#">GO:0017144</a> | 16 | drug metabolic process                         |
| <a href="#">GO:0019748</a> | 16 | secondary metabolic process                    |
| <a href="#">GO:0006508</a> | 12 | proteolysis                                    |
| <a href="#">GO:0032196</a> | 12 | transposition                                  |
| <a href="#">GO:0006457</a> | 11 | protein folding                                |
| <a href="#">GO:0009225</a> | 9  | nucleotide-sugar metabolic process             |
| <a href="#">GO:0051189</a> | 9  | prosthetic group metabolic process             |
| <a href="#">GO:0006081</a> | 8  | cellular aldehyde metabolic process            |
| <a href="#">GO:0006112</a> | 8  | energy reserve metabolic process               |
| <a href="#">GO:0006818</a> | 8  | hydrogen transport                             |
| <a href="#">GO:0015849</a> | 8  | organic acid transport                         |
| <a href="#">GO:0022607</a> | 8  | cellular component assembly                    |
| <a href="#">GO:0032501</a> | 8  | multicellular organismal process               |
| <a href="#">GO:0051301</a> | 8  | cell division                                  |
| <a href="#">GO:0006730</a> | 7  | one-carbon metabolic process                   |
| <a href="#">GO:0008643</a> | 7  | carbohydrate transport                         |
| <a href="#">GO:0022411</a> | 7  | cellular component disassembly                 |
| <a href="#">GO:0051641</a> | 7  | cellular localization                          |
| <a href="#">GO:0006662</a> | 6  | glycerol ether metabolic process               |
| <a href="#">GO:0006996</a> | 6  | organelle organization                         |
| <a href="#">GO:0043101</a> | 6  | purine-containing compound salvage             |

|                            |   |                                               |
|----------------------------|---|-----------------------------------------------|
| <a href="#">GO:0006119</a> | 5 | oxidative phosphorylation                     |
| <a href="#">GO:0007049</a> | 5 | cell cycle                                    |
| <a href="#">GO:0015979</a> | 5 | photosynthesis                                |
| <a href="#">GO:0034622</a> | 5 | cellular macromolecular complex assembly      |
| <a href="#">GO:0040007</a> | 5 | growth                                        |
| <a href="#">GO:0045229</a> | 5 | external encapsulating structure organization |
| <a href="#">GO:0007059</a> | 4 | chromosome segregation                        |
| <a href="#">GO:0008655</a> | 4 | pyrimidine-containing compound salvage        |
| <a href="#">GO:0042445</a> | 4 | hormone metabolic process                     |
| <a href="#">GO:0051276</a> | 4 | chromosome organization                       |
| <a href="#">GO:0000003</a> | 3 | reproduction                                  |
| <a href="#">GO:0006869</a> | 3 | lipid transport                               |
| <a href="#">GO:0009404</a> | 3 | toxin metabolic process                       |
| <a href="#">GO:0015833</a> | 3 | peptide transport                             |
| <a href="#">GO:0016032</a> | 3 | viral process                                 |
| <a href="#">GO:0032392</a> | 3 | DNA geometric change                          |
| <a href="#">GO:0043094</a> | 3 | cellular metabolic compound salvage           |
| <a href="#">GO:0044419</a> | 3 | interspecies interaction between organisms    |
| <a href="#">GO:0002376</a> | 2 | immune system process                         |
| <a href="#">GO:0006354</a> | 2 | DNA-templated transcription, elongation       |
| <a href="#">GO:0006928</a> | 2 | movement of cell or subcellular component     |
| <a href="#">GO:0007005</a> | 2 | mitochondrion organization                    |
| <a href="#">GO:0015074</a> | 2 | DNA integration                               |
| <a href="#">GO:0015976</a> | 2 | carbon utilization                            |
| <a href="#">GO:0016049</a> | 2 | cell growth                                   |
| <a href="#">GO:0048469</a> | 2 | cell maturation                               |
| <a href="#">GO:0051604</a> | 2 | protein maturation                            |
| <a href="#">GO:0000746</a> | 1 | conjugation                                   |
| <a href="#">GO:0006113</a> | 1 | fermentation                                  |
| <a href="#">GO:0006323</a> | 1 | DNA packaging                                 |
| <a href="#">GO:0007031</a> | 1 | peroxisome organization                       |
| <a href="#">GO:0009292</a> | 1 | genetic transfer                              |
| <a href="#">GO:0015835</a> | 1 | peptidoglycan transport                       |
| <a href="#">GO:0015893</a> | 1 | drug transport                                |
| <a href="#">GO:0015920</a> | 1 | lipopolysaccharide transport                  |
| <a href="#">GO:0015931</a> | 1 | nucleobase-containing compound transport      |
| <a href="#">GO:0016458</a> | 1 | gene silencing                                |
| <a href="#">GO:0040011</a> | 1 | locomotion                                    |

|                            |   |                                   |
|----------------------------|---|-----------------------------------|
| <a href="#">GO:0043449</a> | 1 | cellular alkene metabolic process |
| <a href="#">GO:0046903</a> | 1 | secretion                         |
| <a href="#">GO:0048285</a> | 1 | organelle fission                 |
| <a href="#">GO:0050877</a> | 1 | neurological system process       |
| <a href="#">GO:0051180</a> | 1 | vitamin transport                 |
| <a href="#">GO:0051181</a> | 1 | cofactor transport                |
| <a href="#">GO:0051258</a> | 1 | protein polymerization            |

**Table S5.** Molecular function list for the representatives of the second group.

| GO                         | Count of unique<br>input accessions | Name                                     |
|----------------------------|-------------------------------------|------------------------------------------|
| <a href="#">GO:0016491</a> | 122                                 | oxidoreductase activity                  |
| <a href="#">GO:0016787</a> | 94                                  | hydrolase activity                       |
| <a href="#">GO:0003674</a> | 84                                  | molecular_function                       |
| <a href="#">GO:0016740</a> | 77                                  | transferase activity                     |
| <a href="#">GO:0043167</a> | 74                                  | ion binding                              |
| <a href="#">GO:0005215</a> | 66                                  | transporter activity                     |
| <a href="#">GO:0003676</a> | 57                                  | nucleic acid binding                     |
| <a href="#">GO:0000166</a> | 33                                  | nucleotide binding                       |
| <a href="#">GO:0048037</a> | 29                                  | cofactor binding                         |
| <a href="#">GO:0005488</a> | 27                                  | binding                                  |
| <a href="#">GO:0008233</a> | 21                                  | peptidase activity                       |
| <a href="#">GO:0001882</a> | 18                                  | nucleoside binding                       |
| <a href="#">GO:0004497</a> | 10                                  | monooxygenase activity                   |
| <a href="#">GO:0003824</a> | 7                                   | catalytic activity                       |
| <a href="#">GO:0004871</a> | 7                                   | signal transducer activity               |
| <a href="#">GO:0016829</a> | 6                                   | lyase activity                           |
| <a href="#">GO:0016209</a> | 5                                   | antioxidant activity                     |
| <a href="#">GO:0016874</a> | 5                                   | ligase activity                          |
| <a href="#">GO:0004386</a> | 4                                   | helicase activity                        |
| <a href="#">GO:0016853</a> | 4                                   | isomerase activity                       |
| <a href="#">GO:0051213</a> | 4                                   | dioxygenase activity                     |
| <a href="#">GO:0005515</a> | 3                                   | protein binding                          |
| <a href="#">GO:0009055</a> | 2                                   | electron carrier activity                |
| <a href="#">GO:0031409</a> | 2                                   | pigment binding                          |
| <a href="#">GO:0001871</a> | 1                                   | pattern binding                          |
| <a href="#">GO:0008144</a> | 1                                   | drug binding                             |
| <a href="#">GO:0008289</a> | 1                                   | lipid binding                            |
| <a href="#">GO:0008641</a> | 1                                   | small protein activating enzyme activity |
| <a href="#">GO:0019239</a> | 1                                   | deaminase activity                       |
| <a href="#">GO:0030246</a> | 1                                   | carbohydrate binding                     |
| <a href="#">GO:0033218</a> | 1                                   | amide binding                            |
| <a href="#">GO:0043021</a> | 1                                   | ribonucleoprotein complex binding        |
